# Supplementary material for: Lentil Fortified Spaghetti: Technological Properties and Nutritional Characterization
Source: PubMed Central journal article supplement (PMC7821932; doi:10.3390/foods10010004), 2020-12-22
Supplement: foods-10-00004-s001.pdf [file foods-10-00004-s001.pdf]

## Supplementary material

Table S1: Amino acids content (mg g<sup>-1</sup>) in uncooked lentil fortified spaghetti

|                | CTRL | LC    | LR    | LC-CMC | LR-CMC |
|----------------|------|-------|-------|--------|--------|
| Alanine        | 0.17 | 0.64  | 0.99  | 0.60   | 0.41   |
| Valine*        | 0.54 | 1.38  | 1.20  | 1.11   | 0.99   |
| Isoleucine*    | 0.47 | 1.34  | 2.16  | 1.05   | 0.85   |
| Leucine        | 1.02 | 2.38  | 3.31  | 1.27   | 2.14   |
| Glycine        | 0.26 | 0.58  | 1.18  | 0.12   | 0.62   |
| Proline        | 1.21 | 2.69  | 4.07  | 2.55   | 1.88   |
| Aspartic Acid  | 0.56 | 3.42  | 2.72  | 1.87   | 1.36   |
| Threonine*     | 0.59 | 1.29  | 2.46  | 0.52   | 0.99   |
| Methionine*    | 0.91 | 1.27  | 1.07  | 0.84   | 0.76   |
| Glutamic Acid  | 10.4 | 19.7  | 46.1  | 18.1   | 28.7   |
| Serina         | 1.20 | 1.42  | 5.41  | 0.73   | 2.09   |
| Phenylalanine* | 2.14 | 4.46  | 8.07  | 3.59   | 3.76   |
| Lysine*        | 0.31 | 1.28  | 1.72  | 0.39   | 0.54   |
| Total BCAA     | 2.03 | 5.10  | 6.67  | 3.43   | 3.98   |
| Total EAA      | 4.96 | 11.02 | 16.68 | 7.5    | 7.89   |

\*essential aa; EAA=essential amino acids, BCAA=branched-chain amino acids (leucine, isoleucine and valine).
